# Supplementary material for: A platform for assessing chemotactic migration within a spatiotemporally defined 3D microenvironment
Source: Royal Society of Chemistry journal article supplement (doi:10.1039/b803533d), 2008-01-01
Supplement: b803533d_supplementary_fig1.pdf [file b803533d_supplementary_fig1.pdf]

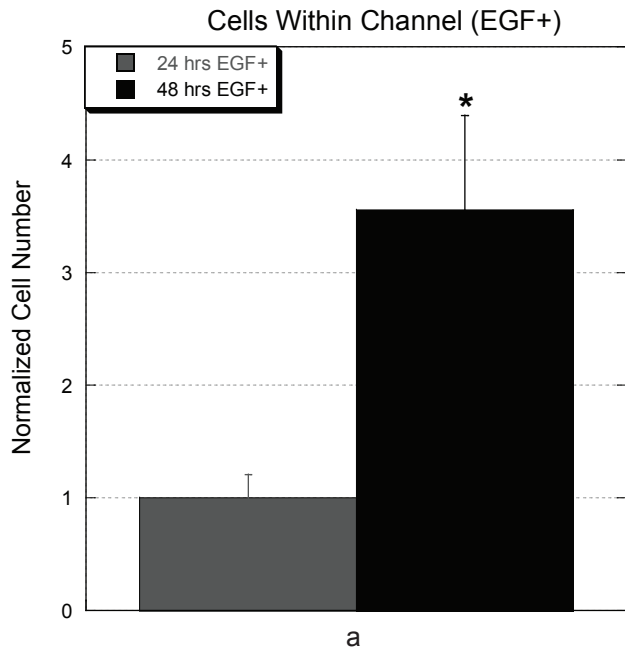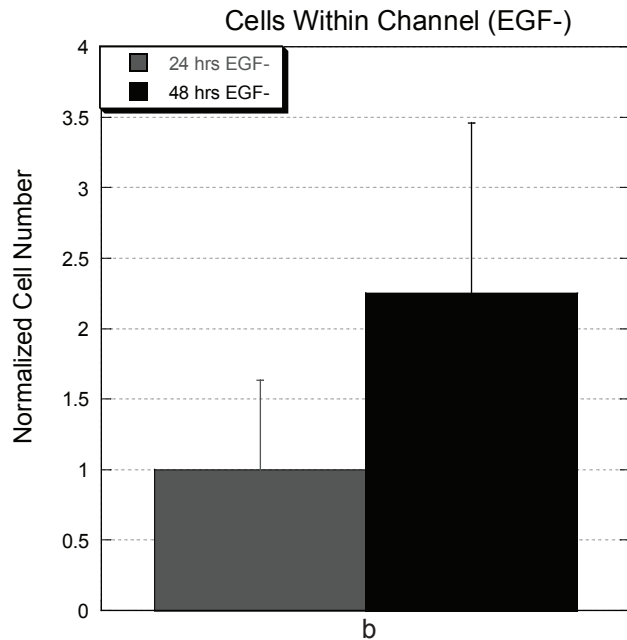

Supplementary Figure 1: Normalized cell numbers for stimulated and unstimulated conditions at 24 and 48 hour time points. a) The difference in cell number within the stimulated channels was statistically significant ( $P = 0.027$ ), while b) the difference in cell number within the unstimulated channels was not statistically significant ( $P = 0.388$ ).
